# Supplementary material
Source: MDPI journal article supplement (https://www.mdpi.com/1999-4907/9/9/569)
Supplement: s1 [file s1]

## Supplementary Materials

**Table S1.** Comparison of published equations.  $Z$  (or  $t$ ) values represent differences in slope ( $b$ ) from that of the associated phylogenetic equation, and include  $p$ -values. Those differences that are significant at the 0.05 threshold are marked as \*.

|                           | $t$ value ( $p$ ) |
|---------------------------|-------------------|
| <b><i>Alnus</i></b>       |                   |
| Conolly & Grigal (1983)   | 5.03 (<0.01) *    |
| Berner et al. (2014)      | 4.01 (<0.01) *    |
| <b><i>Salix spp.</i></b>  |                   |
| Conolly & Grigal (1983)   | 1.46 (0.15)       |
| Berner et al. (2014)      | 2.56 (0.01) *     |
| Brand & Smith. (1985)     | 2.55 (0.01) *     |
| <b><i>Betula spp.</i></b> |                   |
| Conolly & Grigal (1983)   | 4.06 (<0.01) *    |
| Berner et al. (2014)      | 5.41 (<0.01) *    |
